# Supplementary material for: Children’s perception of interpersonal coordination during joint painting
Source: PubMed Central journal article supplement (PMC9640642; doi:10.1038/s41598-022-22516-2), 2022-11-07
Supplement: 41598_2022_22516_MOESM3_ESM.pdf [file 41598_2022_22516_MOESM3_ESM.pdf]

## 1. Parent information and consent form

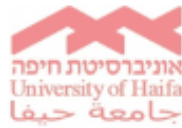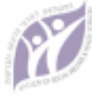

Qualtrics Survey Software

הפקולטה למדעי הרווחה והבריאות

Faculty of Social Welfare & Health  
Sciences

الكلية لعلوم الرفاه والصحة

### Questionnaire – co-painting

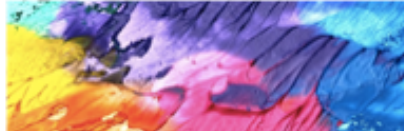

We invite typically developing children aged 9-11 and their parent to participate in a research study that looks at the interaction between a child and an adult during co-painting. This research is being conducted at the School of Creative Arts Therapies and the Department of Psychology at the University of Haifa.

Participation includes watching two short video excerpts portraying an adult and a child painting together, followed by an anonymous questionnaire regarding the interaction between them. In the first stage, the parent is asked to watch the videos and answer the questions, and in the second stage, the child is asked to watch the videos and answer the questions.

The estimated total time for each person to complete the study is about 10 minutes.

Filling out the questionnaire can be done independently by the child using a computer and if there is a technical difficulty, the parent can assist.

Importantly, the child must work independently, without the parents involvement.

We ask that you complete the study using a computer, in order to ensure an optimal view of the video excerpts and questions.

The study is approved by the Ethics Committee of the University of Haifa.

Thank you for your cooperation.

Dr. Tal-Chen Rabinowitch, The School of Creative Arts Therapies, University of Haifa

Rotem Abraham, The School of Creative Arts Therapies, University of Haifa

Naama Rachel Nissel Miller, The Department of Psychology, University of Haifa

Phone inquiries: 972-54-2567502, 972-52-4677565

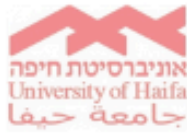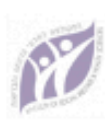

**Confirmation of my participation and the participation of my child in  
research on the subject: Dyadic communication in co-painting**

I confirm that I have read the information presented to me and that the purpose of the research has been explained to me.  
I understand that participation is by choice only, and if I refuse it will not have any consequences for me or my child in the future.  
I understand that I/my child can cease participation at any stage, and this will not have any consequences for me or my child in the future.  
I agree to my participation and the participation of my child in this study and I am prepared for the questionnaire to be used for research purposes only.

**Please mark according to your choice:**

- I **confirm** my participation and the participation of my child in the study
- I **do not** confirm my/ my child participation in the study

## 2. Parent questions

Qualtrics Survey Software

**This part should be filled out by the parent**

**Personal details of my child**

**Month and year of birth of my child**

**Participation in the questionnaire will be conducted by**

| Month                | Year                 |                |
|----------------------|----------------------|----------------|
| <input type="text"/> | <input type="text"/> | Please choose: |

My son

My daughter

### 3. Video presentation for child

Qualtrics Survey Software

#### This part should be filled out by the child

You are about to watch two short, 1.5 minute, video excerpts, followed by questions that relate to the excerpts.

We ask for your opinion only. There are no right or wrong answers.

We would like to remind you that the filling out this section is done by the child only, without the presence and participation of the parent.

We asked Kara and Tara, and also Jackie and Becky, to paint together. Please watch the video excerpts, and answer the following questions.

**Kara and Tara are painting together.**  
Kara is the adult and Tara is the child.

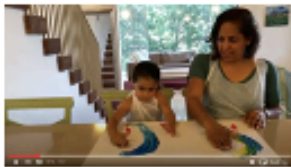

**Jackie and Becky are painting together.**  
Jackie is the adult and Becky the child.

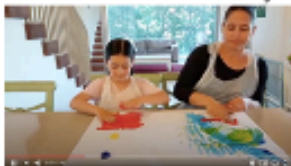

**please confirm:**

I watched both video excerpts

## 4. Child questionnaire

### Empathy

Qualtrics Survey Software

Please remember: There is no right or wrong answer, we only want your own personal opinion.

**Who better understood the child's painting?**

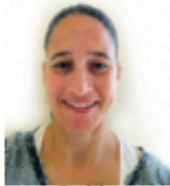

Jackie  
A lot more

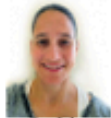

Jackie  
A little more

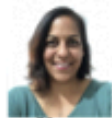

Kara  
A little more

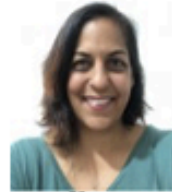

Kara  
A lot more

**Who better understood what the child felt and thought?**

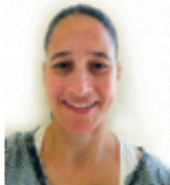

Jackie  
A lot more

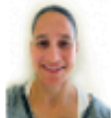

Jackie  
A little more

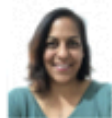

Kara  
A little more

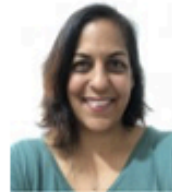

Kara  
A lot more

**Who was more attentive to the child?**

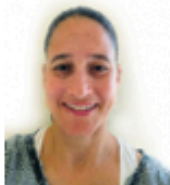

Jackie  
A lot more

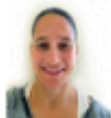

Jackie  
A little more

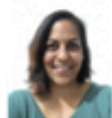

Kara  
A little more

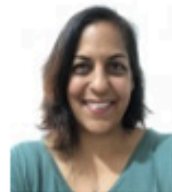

Kara  
A lot more

**Who was more interested in the child's painting?**

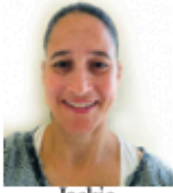

Jackie  
A lot more

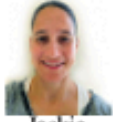

Jackie  
A little more

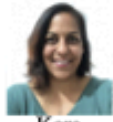

Kara  
A little more

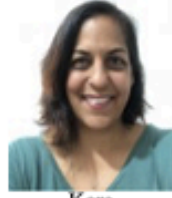

Kara  
A lot more

Trust

Qualtrics Survey Software

**Who do you think is right?**

Please remember: There is no right or wrong answer, we only want your own personal opinion.

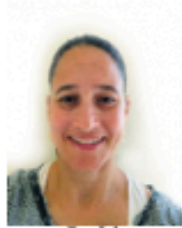

**Jackie**

Painting is an enjoyable activity

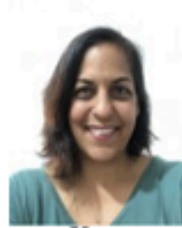

**Kara**

Painting is a fun activity

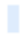

Closeness

Qualtrics Survey Software

**Out of the six pairs of circles, which best portrays how close Kara and Tara feel towards each other?**

**Please remember: There is no right or wrong answer, we only want your own personal opinion.**

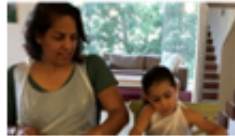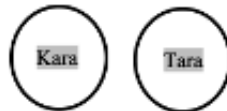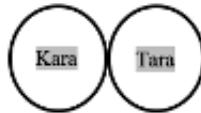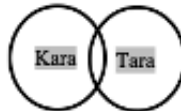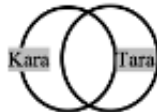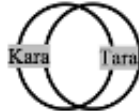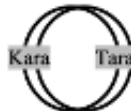



**Out of the six pairs of circles, which best portrays how close Jackie and Becky feel towards each other?**

**Please remember: There is no right or wrong answer, we only want your own personal opinion.**

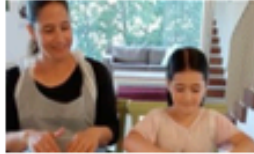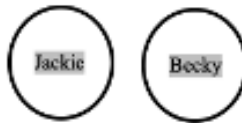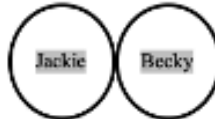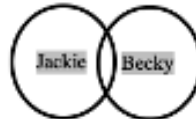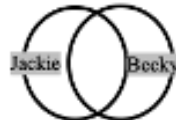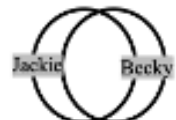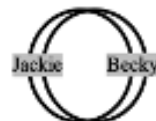

Similarity

Qualtrics Survey Software

Please remember: There is no right or wrong answer, we only want your own personal opinion.

Which pair generally looks more similar?

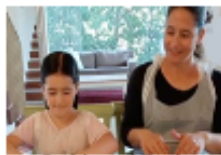

Jackie and Becky  
A lot more

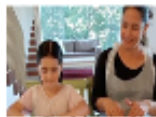

Jackie and  
Becky  
A little more

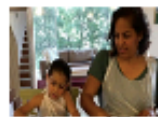

Kara and Tara  
A little more

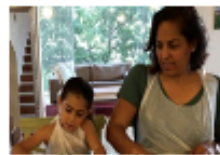

Kara and Tara  
A lot more

Which pair has more common interests?

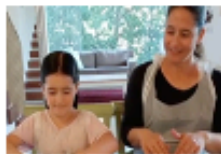

Jackie and Becky  
A lot more

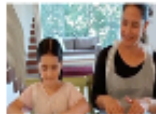

Jackie and  
Becky  
A little more

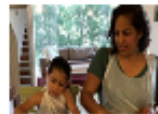

Kara and Tara  
A little more

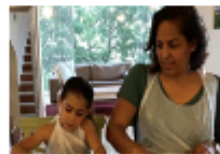

Kara and Tara  
A lot more

Which adult reminds you more of the child she paints with?

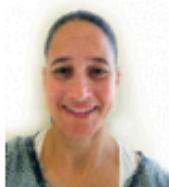

Jackie  
A lot more

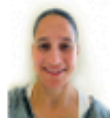

Jackie  
A little more

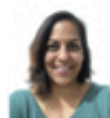

Kara  
A little more

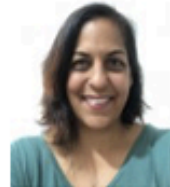

Kara  
A lot more

**Which adult is more similar in character to the child she paints with?**

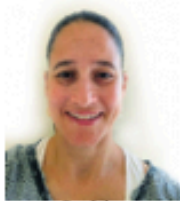

Jackie  
A lot more

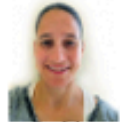

Jackie  
A little more

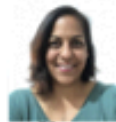

Kara  
A little more

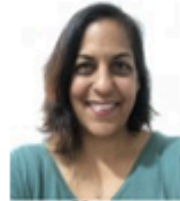

Kara  
A lot more

**Which adult likes similar painting styles to the ones the child she paints with does?**

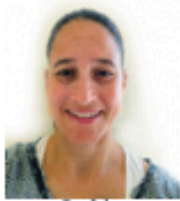

Jackie  
A lot more

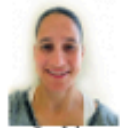

Jackie  
A little more

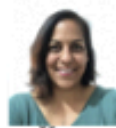

Kara  
A little more

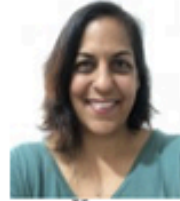

Kara  
A lot more

Quality of interaction

Qualtrics Survey Software

Please remember: There is no right or wrong answer, we only want your own personal opinion.

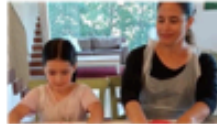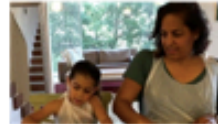

Which child was more comfortable with the painting activity?

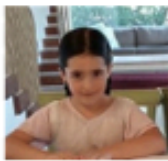

Becky  
A lot more

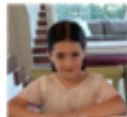

Becky  
A little more

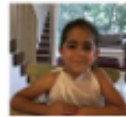

Tara  
A little more

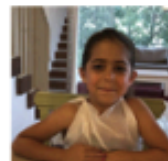

Tara  
A lot more

Which child felt freer during the painting activity?

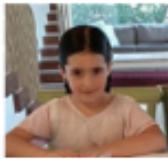

Becky  
A lot more

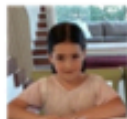

Becky  
A little more

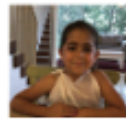

Tara  
A little more

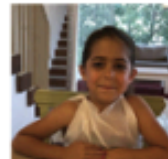

Tara  
A lot more

Which child enjoyed the painting activity more?

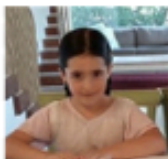

Becky  
A lot more

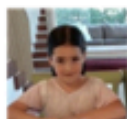

Becky  
A little more

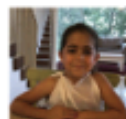

Tara  
A little more

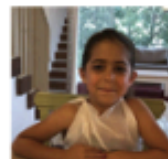

Tara  
A lot more
